# Supplementary material for: DJ-1 modulates the unfolded protein response and cell death via upregulation of ATF4 following ER stress
Source: PubMed Central journal article supplement (PMC6372623; doi:10.1038/s41419-019-1354-2), 2019-02-12

# Supplementary data 3

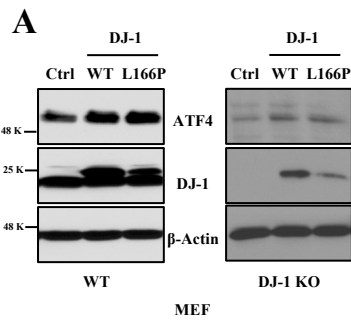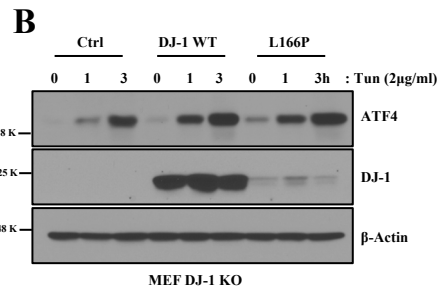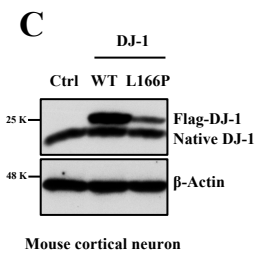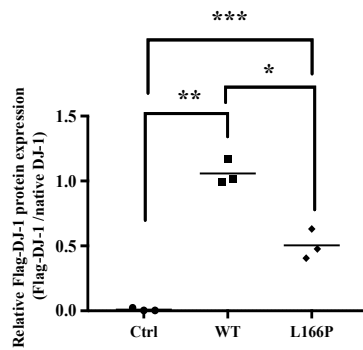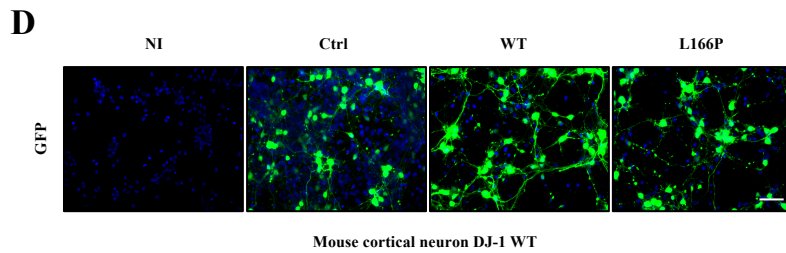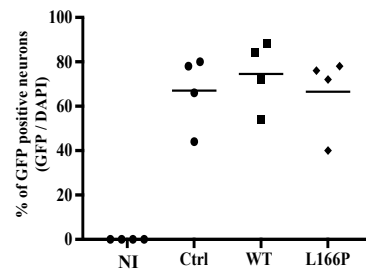

Supplement: 41419_2019_1354_MOESM4_ESM.pdf [file 41419_2019_1354_MOESM4_ESM.pdf]
